# Supplementary material
Source: HighWire-hosted journal article supplement (https://cmaj.ca/highwire/filestream/58745/field_highwire_adjunct_files/1/psych-hamer-2-at.pdf)
Supplement: psych-hamer-2-at.pdf [file psych-hamer-2-at.pdf]

**Appendix 2 (as supplied by the author): The association between psychological distress and cardiovascular disease mortality (*n* =21 385)**

| Death outcome           | No. events | Age and sex adjusted HR (95% CI) for GHQ-12 $\geq$ 4 | Multivariable HR (95% CI) for GHQ-12 $\geq$ 4 |
|-------------------------|------------|------------------------------------------------------|-----------------------------------------------|
| All CVD                 | 802        | 1.80 (1.49 – 2.18)                                   | 1.55 (1.28 – 1.88)                            |
| Cerebrovascular disease | 210        | 1.76 (1.22 – 2.55)                                   | 1.60 (1.10 – 2.33)                            |
| Ischemic heart disease  | 358        | 1.47 (1.07 – 2.01)                                   | 1.22 (0.89 – 1.69)                            |

Multivariable model adjusted for: age, sex, ethnicity, socio-economic group, smoking, anti-hypertensive medication, alcohol (quintile of units per week), moderate to vigorous physical activity (none; <1/wk; 1 to <3/wk;  $\geq$ 3 sessions/wk), physician diagnosed diabetes, body mass index category (<25; 25 – 29.99;  $\geq$ 30 kg.m<sup>2</sup>), and survey year
